# Supplementary material for: I-Shaped Dimers of a Plant Chloroplast FOF1-ATP Synthase in Response to Changes in Ionic Strength
Source: MDPI journal article supplement (doi:10.3390/ijms241310720), 2023-06-27
Supplement: s1 [file s1]

## Supplementary Information

**I-shaped dimers of a plant chloroplast F<sub>o</sub>F<sub>1</sub>-ATP synthase in response to changes in ionic strength**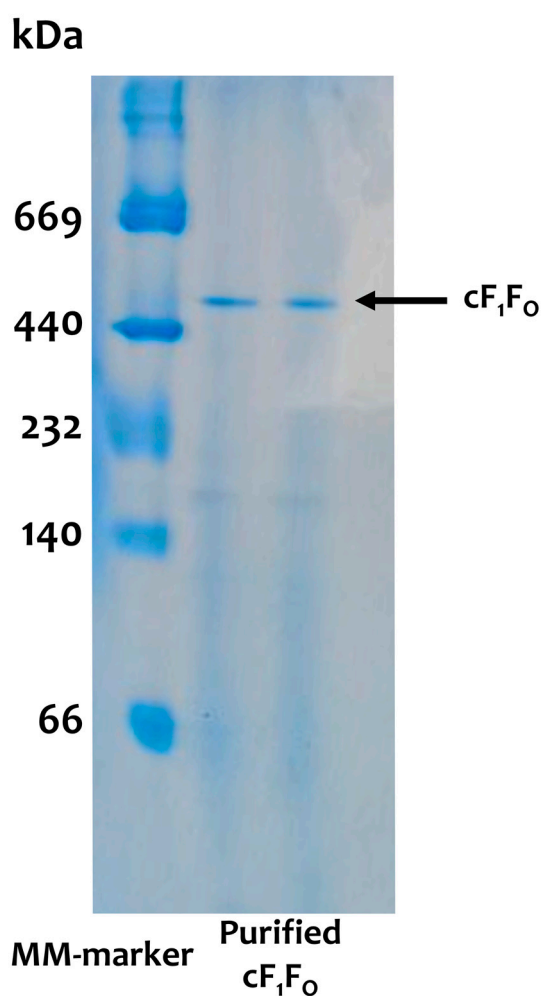

**Figure S1.** Characterization of the purified cF<sub>o</sub>F<sub>1</sub> by BN-PAGE (6 – 18 %). MM-marker: 66, 140, 232, 440, 669 kDa. Purified samples of cF<sub>o</sub>F<sub>1</sub> showed the band between 440 and 669 kDa. The molecular weight of the cF<sub>o</sub>F<sub>1</sub> complex is ~595 kDa. Marker proteins are water soluble but cF<sub>o</sub>F<sub>1</sub> is a partly membrane protein complex and it also has a detergent belt, therefore different migration distance could be observed. A single band demonstrates that cF<sub>o</sub>F<sub>1</sub> is intact.

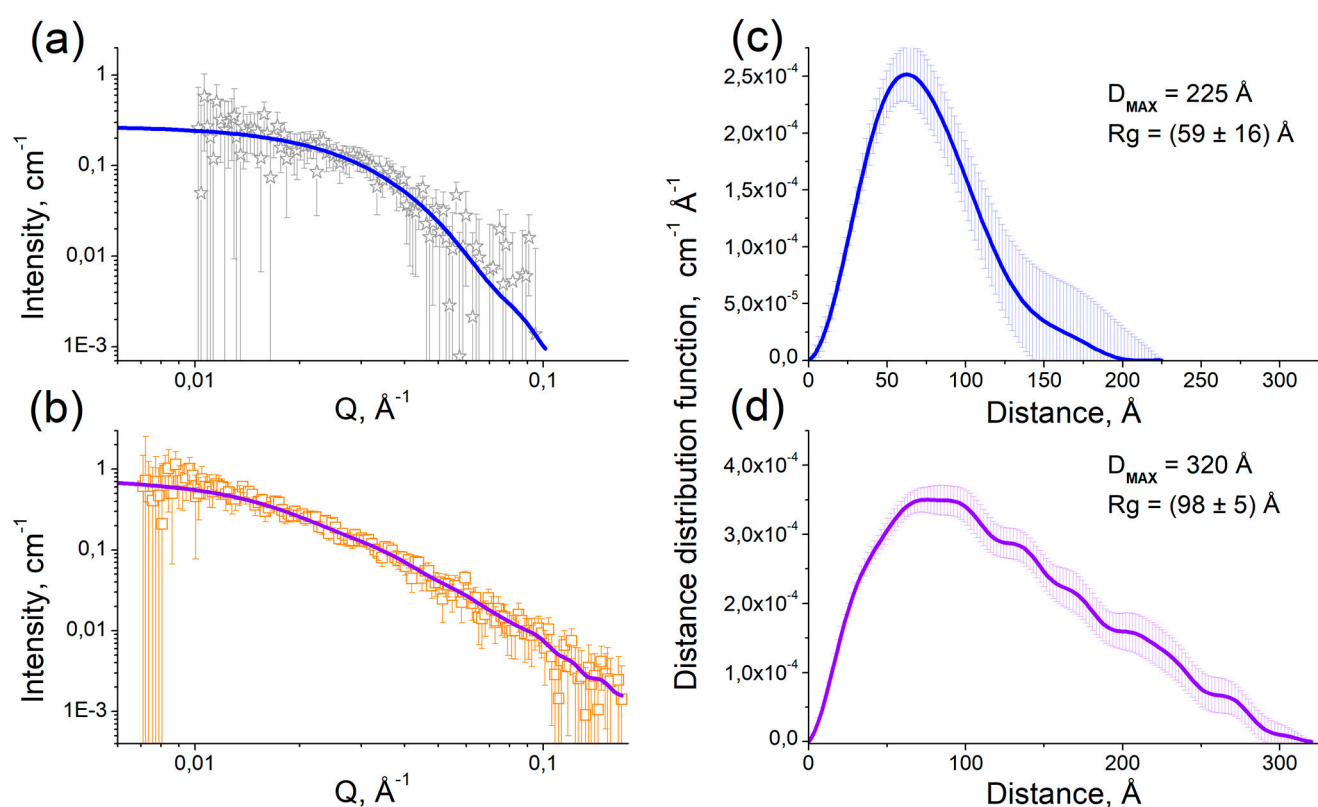

**Figure S2.** SANS characterization of cFoF1: (a) SANS experimental data for AEX-purified cFoF1 in H<sub>2</sub>O-buffer (hollow grey stars) and a regularized fit (blue line); (b) SANS experimental data for cFoF1 at 300 mM NaCl in 93% D<sub>2</sub>O-buffer (hollow orange squares) and a regularized fit (purple line); (c) Pair-distance distribution function P(r) for cFoF1 in H<sub>2</sub>O-buffer; (d) Pair-distance distribution function P(r) for cFoF1 at 300 mM NaCl in 93% D<sub>2</sub>O-buffer.

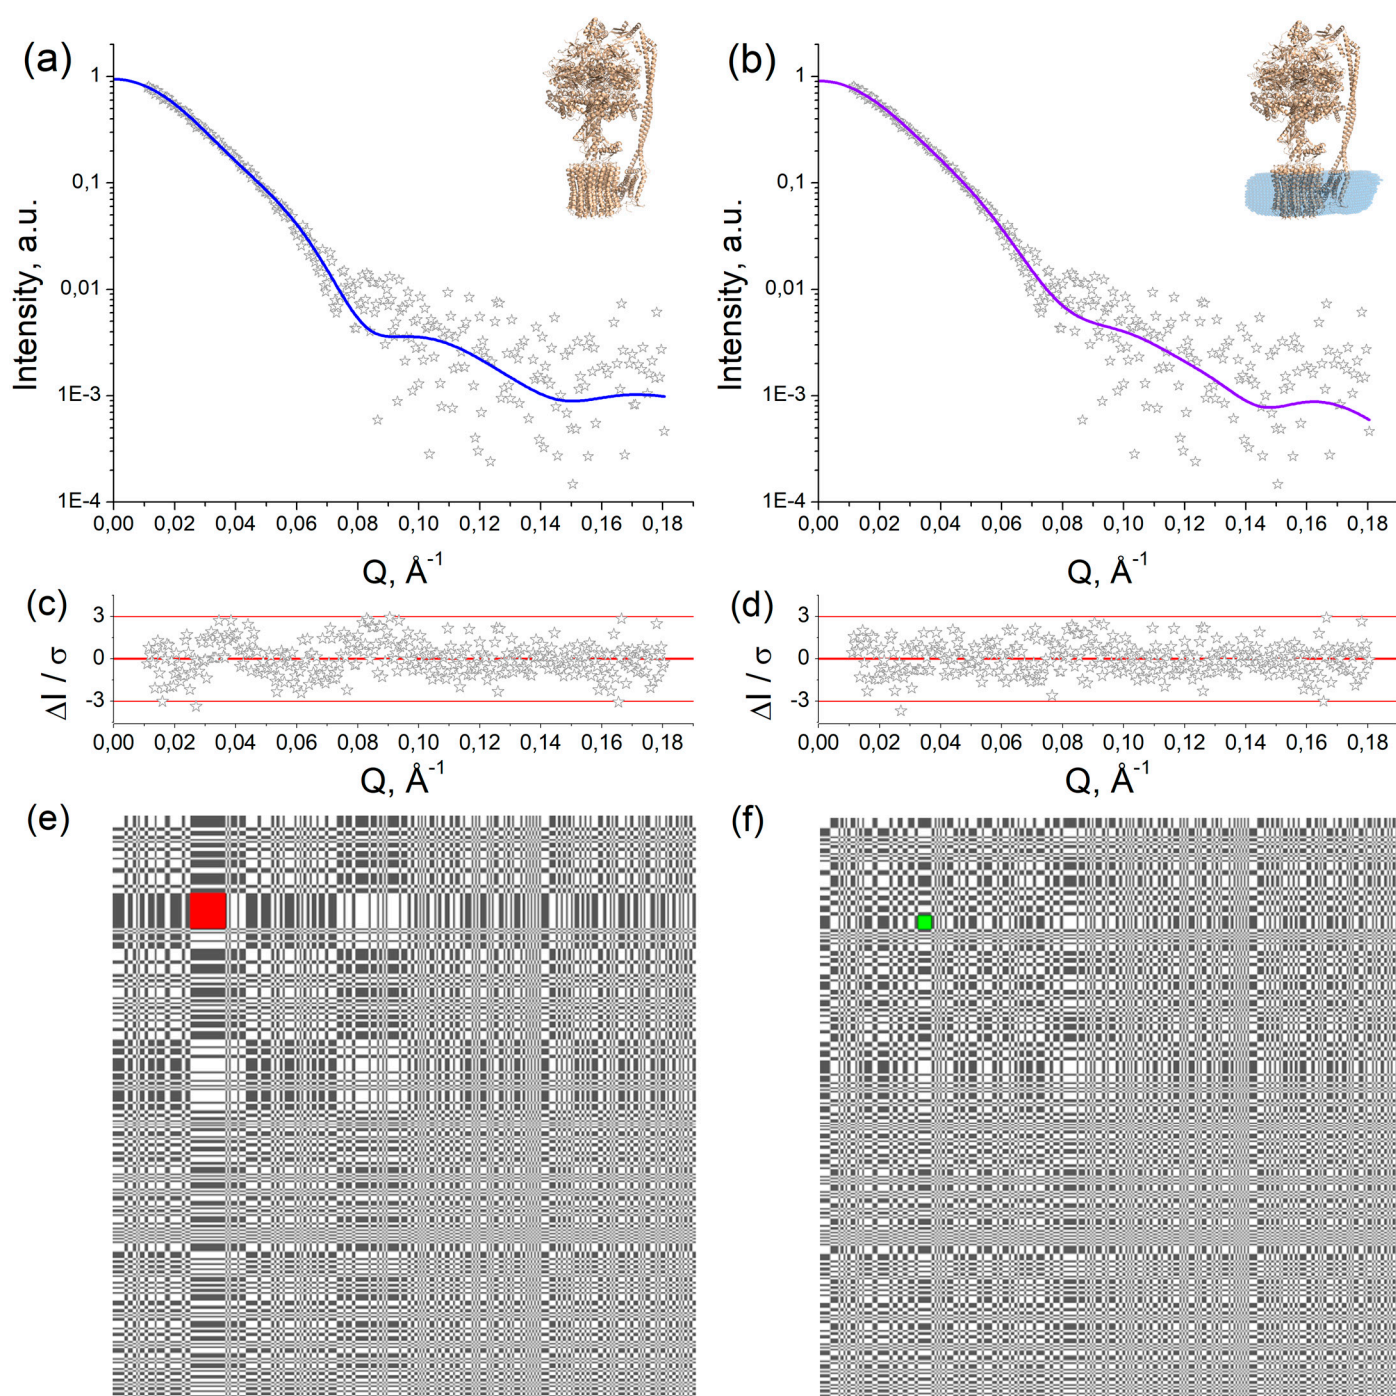

**Figure S3.** Influence of a detergent belt on quality of SAXS data approximation: (a) SAXS experimental data for cFoF<sub>1</sub> (hollow grey stars) and an approximation (blue line,  $\chi^2 = 1.35$ ) obtained by CRY SOL for the model of cFoF<sub>1</sub> without a detergent belt (PDB ID: 6FKF); (b) SAXS experimental data for cFoF<sub>1</sub> the same as in panel (a) (hollow grey stars) and an approximation (blue line,  $\chi^2 = 1.15$ ) obtained by CRY SOL for model of protein with detergent belt built by MEMPROT; (c) Relative residues of the fit shown in panel (a); (d) Relative residues of the fit shown in panel (b); (e) Correlation map (P-value 0.000156) for the fit shown in panel (a); (f) Correlation map (P-value 0.745484) for the fit shown in panel (b).

17

18

19

20

21

22

23

24

25

26

(a)

| #<br>model | HDOCK            |                     | PDBePISA                          |                          |                 |                 | $D_{m-m'}$<br>Å | SAXS data approximation for cF <sub>0</sub> F <sub>1</sub> |                                             |                                             |                                             |                                             |
|------------|------------------|---------------------|-----------------------------------|--------------------------|-----------------|-----------------|-----------------|------------------------------------------------------------|---------------------------------------------|---------------------------------------------|---------------------------------------------|---------------------------------------------|
|            | Docking<br>score | Confidence<br>score | interface<br>area, Å <sup>2</sup> | $\Delta G$ ,<br>kcal/mol | N <sub>HB</sub> | N <sub>SB</sub> |                 | 150 mM<br>NaCl                                             | 250 mM<br>NaCl                              | 300 mM<br>NaCl                              | 350 mM<br>NaCl                              | 450 mM<br>NaCl                              |
| 1          | -154.82          | 0.5241              | 1910,5                            | -0,3                     | 13              | 7               | 168             | $\chi^2 = 1.41$<br>$\alpha_2 = 65 \pm 2 \%$                | $\chi^2 = 1.13$<br>$\alpha_2 = 18 \pm 2 \%$ | $\chi^2 = 1.22$<br>$\alpha_2 = 39 \pm 2 \%$ | $\chi^2 = 1.07$<br>$\alpha_2 = 30 \pm 2 \%$ | $\chi^2 = 1.34$<br>$\alpha_2 = 60 \pm 2 \%$ |
| 2          | -152.11          | 0.5105              | 1046,9                            | 1,7                      | 6               | 6               | 159             | $\chi^2 = 1.41$<br>$\alpha_2 = 62 \pm 2 \%$                | $\chi^2 = 1.13$<br>$\alpha_2 = 17 \pm 2 \%$ | $\chi^2 = 1.23$<br>$\alpha_2 = 37 \pm 2 \%$ | $\chi^2 = 1.07$<br>$\alpha_2 = 28 \pm 2 \%$ | $\chi^2 = 1.34$<br>$\alpha_2 = 57 \pm 2 \%$ |
| 3          | -141.80          | 0.4591              | 1888,2                            | 0,6                      | 13              | 5               | 166             | $\chi^2 = 1.42$<br>$\alpha_2 = 64 \pm 2 \%$                | $\chi^2 = 1.13$<br>$\alpha_2 = 18 \pm 2 \%$ | $\chi^2 = 1.22$<br>$\alpha_2 = 39 \pm 2 \%$ | $\chi^2 = 1.08$<br>$\alpha_2 = 29 \pm 2 \%$ | $\chi^2 = 1.35$<br>$\alpha_2 = 59 \pm 2 \%$ |
| 4          | -139.19          | 0.4462              | 1776,5                            | -4,3                     | 10              | 6               | 203             | $\chi^2 = 1.29$<br>$\alpha_2 = 73 \pm 2 \%$                | $\chi^2 = 1.11$<br>$\alpha_2 = 21 \pm 2 \%$ | $\chi^2 = 1.25$<br>$\alpha_2 = 43 \pm 2 \%$ | $\chi^2 = 1.00$<br>$\alpha_2 = 35 \pm 2 \%$ | $\chi^2 = 1.20$<br>$\alpha_2 = 68 \pm 2 \%$ |
| 5          | -139.18          | 0.4461              | 1218,3                            | 4,8                      | 17              | 4               | 206             | $\chi^2 = 1.26$<br>$\alpha_2 = 77 \pm 2 \%$                | $\chi^2 = 1.10$<br>$\alpha_2 = 23 \pm 2 \%$ | $\chi^2 = 1.28$<br>$\alpha_2 = 44 \pm 3 \%$ | $\chi^2 = 0.96$<br>$\alpha_2 = 38 \pm 2 \%$ | $\chi^2 = 1.17$<br>$\alpha_2 = 71 \pm 2 \%$ |
| 6          | -138.84          | 0.4444              | 1225,8                            | 4,2                      | 13              | 3               | 207             | $\chi^2 = 1.26$<br>$\alpha_2 = 77 \pm 2 \%$                | $\chi^2 = 1.10$<br>$\alpha_2 = 23 \pm 2 \%$ | $\chi^2 = 1.28$<br>$\alpha_2 = 44 \pm 3 \%$ | $\chi^2 = 0.95$<br>$\alpha_2 = 38 \pm 2 \%$ | $\chi^2 = 1.17$<br>$\alpha_2 = 71 \pm 2 \%$ |
| 7          | -137.62          | 0.4384              | 1347,6                            | 2                        | 9               | 8               | 206             | $\chi^2 = 1.25$<br>$\alpha_2 = 76 \pm 2 \%$                | $\chi^2 = 1.10$<br>$\alpha_2 = 23 \pm 2 \%$ | $\chi^2 = 1.27$<br>$\alpha_2 = 44 \pm 3 \%$ | $\chi^2 = 0.96$<br>$\alpha_2 = 37 \pm 2 \%$ | $\chi^2 = 1.16$<br>$\alpha_2 = 71 \pm 2 \%$ |
| 8          | -131.93          | 0.4106              | 1033,1                            | -4,1                     | 8               | 0               | 194             | $\chi^2 = 1.25$<br>$\alpha_2 = 75 \pm 2 \%$                | $\chi^2 = 1.09$<br>$\alpha_2 = 23 \pm 2 \%$ | $\chi^2 = 1.27$<br>$\alpha_2 = 44 \pm 3 \%$ | $\chi^2 = 0.96$<br>$\alpha_2 = 37 \pm 2 \%$ | $\chi^2 = 1.16$<br>$\alpha_2 = 70 \pm 2 \%$ |
| 9          | -129.08          | 0.3969              | 1219,3                            | -0,8                     | 10              | 6               | 209             | $\chi^2 = 1.28$<br>$\alpha_2 = 75 \pm 2 \%$                | $\chi^2 = 1.10$<br>$\alpha_2 = 22 \pm 2 \%$ | $\chi^2 = 1.27$<br>$\alpha_2 = 44 \pm 3 \%$ | $\chi^2 = 0.98$<br>$\alpha_2 = 36 \pm 2 \%$ | $\chi^2 = 1.19$<br>$\alpha_2 = 70 \pm 2 \%$ |
| 10         | -127.96          | 0.3916              | 1033,9                            | 2,3                      | 9               | 5               | 151             | $\chi^2 = 1.36$<br>$\alpha_2 = 62 \pm 2 \%$                | $\chi^2 = 1.12$<br>$\alpha_2 = 17 \pm 2 \%$ | $\chi^2 = 1.24$<br>$\alpha_2 = 36 \pm 2 \%$ | $\chi^2 = 1.05$<br>$\alpha_2 = 28 \pm 2 \%$ | $\chi^2 = 1.29$<br>$\alpha_2 = 57 \pm 2 \%$ |

(b)

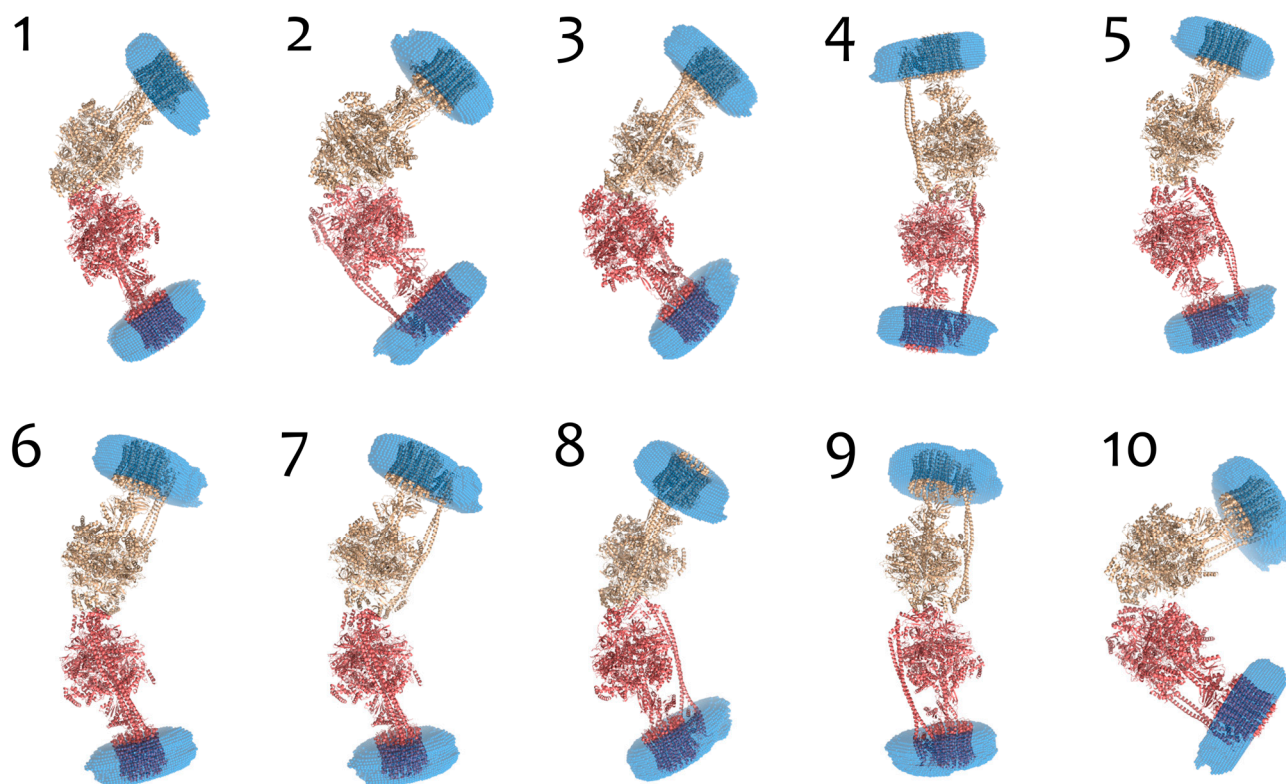

**Figure S4.** Models of F<sub>1</sub>/F<sub>1</sub>-interface dimers of cF<sub>0</sub>F<sub>1</sub> based on the top 10 HDock predictions: **(a)** Table of scoring parameters and SAXS data treatment parameters obtained for the top 10 HDock predictions (see section *Macromolecular docking* in Materials and Methods). Table columns are: internal HDock docking quality estimations (Docking score and Confidence score), parameters of macromolecular interfaces estimated using the PDBePISA web-server (interface area, Gibbs energy  $\Delta G$ , numbers of hydrogen bonds N(HB) and salt bridges N(SB)), distances  $D_{m-m}$  between centers of mass of monomers in the dimers of cF<sub>0</sub>F<sub>1</sub>, and parameters of approximations of SAXS data obtained at 150, 250, 300, 350, and 450 mM NaCl ( $\chi^2$  values and volume fractions of dimers  $\alpha_2$  obtained by the fit in program OLIGOMER); **(b)** Representations of cF<sub>0</sub>F<sub>1</sub> dimers based on the top 10 HDock predictions. The models contain detergent belts obtained by the program MEMPROT.



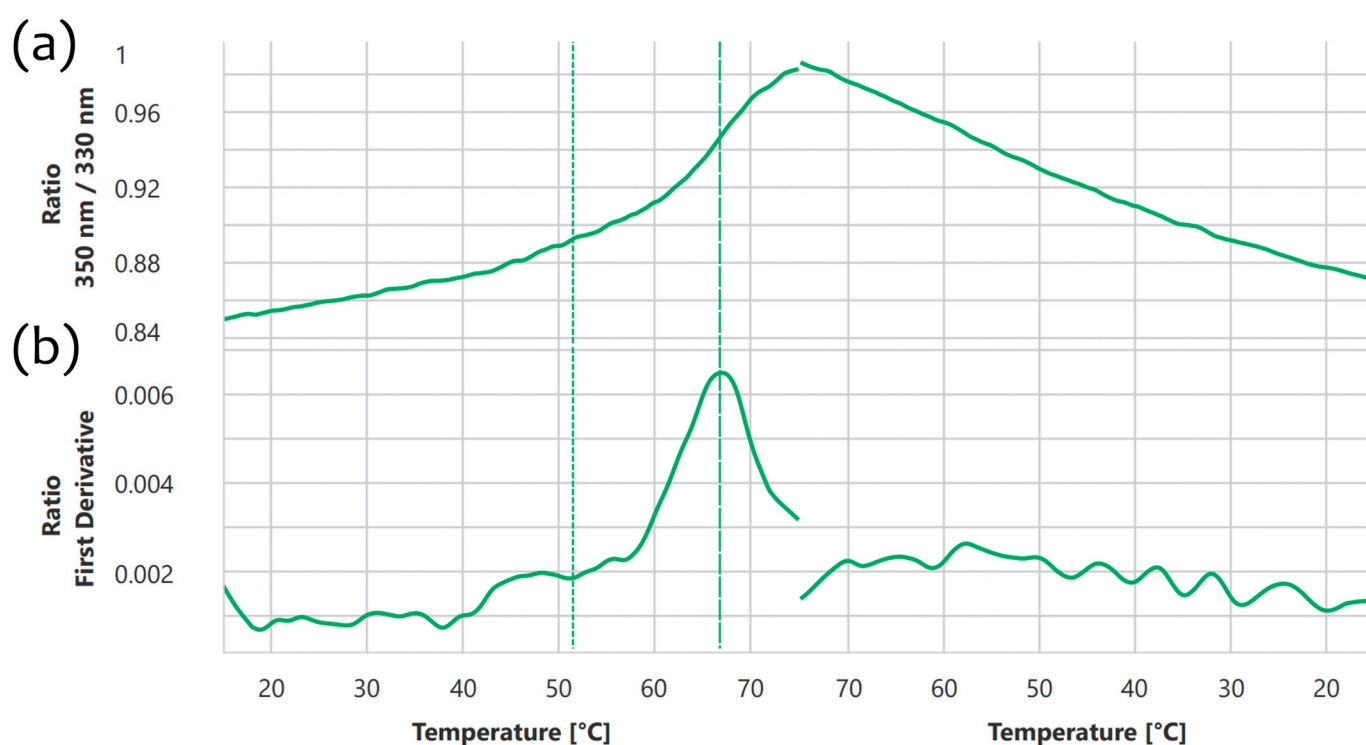

**Figure S5.** Thermal unfolding and refolding graphs measured by nanoDSF method. Vertical short dash line corresponds to  $T_{onset}$ , dash line shows melting temperature  $T_m$ : (a) Ratio of fluorescence intensity at 330 nm and 350 nm for temperature range from 15 °C to 75 °C; (b) First derivative of the 330 nm/350 nm fluorescence intensity ratio.

**Table S1.** SAXS experimental details and data evaluation summary.

43

| (a) Sample details <sup>1</sup>                                           |                                                                                                                                                                                                                                                                                                                                                          |                            |                            |                            |                            |                            |                 |
|---------------------------------------------------------------------------|----------------------------------------------------------------------------------------------------------------------------------------------------------------------------------------------------------------------------------------------------------------------------------------------------------------------------------------------------------|----------------------------|----------------------------|----------------------------|----------------------------|----------------------------|-----------------|
|                                                                           | <i>ATPs AEX</i>                                                                                                                                                                                                                                                                                                                                          | <i>ATPs</i><br>150 mM NaCl | <i>ATPs</i><br>250 mM NaCl | <i>ATPs</i><br>300 mM NaCl | <i>ATPs</i><br>350 mM NaCl | <i>ATPs</i><br>450 mM NaCl |                 |
| Description of sequence                                                   | ATP synthase complex from <i>Spinacia Oleracea</i> (full structure: 6FKF), one complex contains: 3 $\alpha$ (UniProt ID P06450), 3 $\beta$ (UniProt ID P00825), $\gamma$ (UniProt ID P05435), delta (UniProt ID P11402), $\epsilon$ (UniProt ID P00833), a (UniProt ID P06451), b (UniProt ID P06453), b' (UniProt ID P31853), 14 c (UniProt ID P69447). |                            |                            |                            |                            |                            |                 |
| $\epsilon$ 280 (M <sup>-1</sup> cm <sup>-1</sup> )                        | $\alpha$ : 26820, $\beta$ : 17880, $\gamma$ : 10430, $\delta$ : 5960, $\epsilon$ : 11000, a: 42400, b: 9970, b': 4470, c: 1490, full complex: 196 790                                                                                                                                                                                                    |                            |                            |                            |                            |                            |                 |
| Partial specific volume                                                   | 0.7286 cm <sup>3</sup> /g                                                                                                                                                                                                                                                                                                                                |                            |                            |                            |                            |                            |                 |
| Complex volume                                                            | 722670 Å <sup>3</sup>                                                                                                                                                                                                                                                                                                                                    |                            |                            |                            |                            |                            |                 |
| Molecular mass                                                            | 597.24 kDa                                                                                                                                                                                                                                                                                                                                               |                            |                            |                            |                            |                            |                 |
| Sample concentration                                                      | 5.0 mg/ml                                                                                                                                                                                                                                                                                                                                                |                            |                            |                            |                            |                            |                 |
| Solvent composition                                                       | 30 mM HEPES (pH 8.0), 2 mM MgCl <sub>2</sub> , 0.04% <i>tpcc</i> - $\alpha$ -M,<br>~300 mM NaCl, 150 mM NaCl, 250 mM NaCl, 300 mM NaCl, 350 mM NaCl, 450 mM NaCl,                                                                                                                                                                                        |                            |                            |                            |                            |                            |                 |
| (b) SAS data collection parameters                                        |                                                                                                                                                                                                                                                                                                                                                          |                            |                            |                            |                            |                            |                 |
| Instrument                                                                | Rigaku MicroMax-007 HF (MIPT, Dolgoprudny, Russia)                                                                                                                                                                                                                                                                                                       |                            |                            |                            |                            |                            |                 |
| Wavelength                                                                | 1.5406 Å                                                                                                                                                                                                                                                                                                                                                 |                            |                            |                            |                            |                            |                 |
| Beam geometry                                                             | Size (FWHM beam diameter at sample position): 0.3 mm; Sample-to-detector distance: 2.0 m                                                                                                                                                                                                                                                                 |                            |                            |                            |                            |                            |                 |
| Sample configuration                                                      | Glass capillaries with diameters of ~1.5 mm                                                                                                                                                                                                                                                                                                              |                            |                            |                            |                            |                            |                 |
| Q-measurement range                                                       | 0.007 – 0.215 Å <sup>-1</sup>                                                                                                                                                                                                                                                                                                                            |                            |                            |                            |                            |                            |                 |
| Q-scaling method                                                          | Calibration standard: silver behenate powder                                                                                                                                                                                                                                                                                                             |                            |                            |                            |                            |                            |                 |
| Exposure time                                                             | 5400 sec for each sample                                                                                                                                                                                                                                                                                                                                 |                            |                            |                            |                            |                            |                 |
| Sample temperature                                                        | 20 °C                                                                                                                                                                                                                                                                                                                                                    |                            |                            |                            |                            |                            |                 |
| (c) Software employed for SAS data reduction, analysis and interpretation |                                                                                                                                                                                                                                                                                                                                                          |                            |                            |                            |                            |                            |                 |
| Data averaging and subtraction, Guinier analysis                          | PRIMUSqt from ATSAS                                                                                                                                                                                                                                                                                                                                      |                            |                            |                            |                            |                            |                 |
| Calculation of $\epsilon$ from sequence                                   | ProtParam: <a href="https://web.expasy.org/protparam/">https://web.expasy.org/protparam/</a>                                                                                                                                                                                                                                                             |                            |                            |                            |                            |                            |                 |
| Calculation of volume from chemical composition                           | Peptide Property Calculator: <a href="http://biotools.nubic.northwestern.edu/proteincalc.html">http://biotools.nubic.northwestern.edu/proteincalc.html</a>                                                                                                                                                                                               |                            |                            |                            |                            |                            |                 |
| <i>P(r)</i> analysis                                                      | GNOM from ATSAS                                                                                                                                                                                                                                                                                                                                          |                            |                            |                            |                            |                            |                 |
| Atomic structure modelling                                                | HDock web-server; MEMPROT 2.2; CRY SOL 2.0 (command line mode)                                                                                                                                                                                                                                                                                           |                            |                            |                            |                            |                            |                 |
| Molecular graphics                                                        | PyMOL 1.9.x                                                                                                                                                                                                                                                                                                                                              |                            |                            |                            |                            |                            |                 |
| (d) Structural parameters                                                 |                                                                                                                                                                                                                                                                                                                                                          |                            |                            |                            |                            |                            |                 |
|                                                                           | <i>ATPs AEX</i>                                                                                                                                                                                                                                                                                                                                          | <i>ATPs</i><br>150 mM NaCl | <i>ATPs</i><br>250 mM NaCl | <i>ATPs</i><br>300 mM NaCl | <i>ATPs</i><br>350 mM NaCl | <i>ATPs</i><br>450 mM NaCl |                 |
| <i>P(r)</i> analysis                                                      | I(0) (a.u.)                                                                                                                                                                                                                                                                                                                                              | 1.03 ± 0.02                | 1.35 ± 0.04                | 1.00 ± 0.03                | 1.02 ± 0.03                | 1.39 ± 0.05                | 1.66 ± 0.06     |
|                                                                           | R <sub>g</sub> (Å)                                                                                                                                                                                                                                                                                                                                       | 76.5 ± 2.2                 | 104.7 ± 5.0                | 82.5 ± 3.7                 | 90.3 ± 5.1                 | 110.3 ± 7.8                | 129.9 ± 5.4     |
|                                                                           | D <sub>max</sub> (Å)                                                                                                                                                                                                                                                                                                                                     | 285.0                      | 402.16                     | 333.5                      | 382.0                      | 453.0                      | 465.0           |
|                                                                           | Q-range (Å <sup>-1</sup> )                                                                                                                                                                                                                                                                                                                               | 0.0085 – 0.1355            | 0.0065 – 0.1355            | 0.0065 – 0.1355            | 0.0065 – 0.1355            | 0.0065 – 0.1355            | 0.0065 – 0.1355 |
|                                                                           | Q <sub>min</sub> D <sub>max</sub> / $\pi$                                                                                                                                                                                                                                                                                                                | 0.77                       | 0.83                       | 0.69                       | 0,79                       | 0.93                       | 0.96            |
|                                                                           | Total quality estimate (GNOM)                                                                                                                                                                                                                                                                                                                            | 0.6756                     | 0.6556                     | 0.6460                     | 0.5497                     | 0.6647                     | 0.6468          |

<sup>1</sup>These values were calculated from the protein sequence without taking into account possible ligands (ADP, ATP, etc.) or detergent molecules.

|                                  |                                                 |                                                                                                                                                                                                                                                                                                                                                                                                                                        |                     |                     |                     |                     |                 |
|----------------------------------|-------------------------------------------------|----------------------------------------------------------------------------------------------------------------------------------------------------------------------------------------------------------------------------------------------------------------------------------------------------------------------------------------------------------------------------------------------------------------------------------------|---------------------|---------------------|---------------------|---------------------|-----------------|
| 44<br>45<br>46<br>47<br>48<br>49 | Guinier analysis                                | I(0) (a.u.)                                                                                                                                                                                                                                                                                                                                                                                                                            | 1.05 ± 0.03         | 1.33 ± 0.03         | 0.97 ± 0.02         | 0.97 ± 0.03         | 1.30 ± 0.03     |
|                                  |                                                 | Rg (Å)                                                                                                                                                                                                                                                                                                                                                                                                                                 | 75.9 ± 3.0          | 96.0 ± 2.9          | 73.7 ± 1.7          | 78.3 ± 3.1          | 88.7 ± 2.8      |
|                                  |                                                 | Q Rg – range                                                                                                                                                                                                                                                                                                                                                                                                                           | 0.64 – 1.29         | 0.72 – 1.30         | 0.48 – 1.29         | 0.51 – 1.29         | 0.58 – 1.29     |
| 50                               | (e) Atomistic modelling                         |                                                                                                                                                                                                                                                                                                                                                                                                                                        |                     |                     |                     |                     |                 |
| 51                               |                                                 | ATPs AEX                                                                                                                                                                                                                                                                                                                                                                                                                               | ATPs<br>150 mM NaCl | ATPs<br>250 mM NaCl | ATPs<br>300 mM NaCl | ATPs<br>350 mM NaCl |                 |
| 52                               |                                                 | Q-range (Å <sup>-1</sup> )                                                                                                                                                                                                                                                                                                                                                                                                             | 0.011 – 0.1805      | 0.0075 – 0.1805     | 0.0070 – 0.1805     | 0.0065 – 0.1805     | 0.0065 – 0.1805 |
|                                  | Method                                          | CRY SOL 2.0 (command line mode)                                                                                                                                                                                                                                                                                                                                                                                                        |                     |                     |                     |                     |                 |
|                                  | Any measures of model precision                 | Protein model (PDB ID: 6FKF) without detergent belt                                                                                                                                                                                                                                                                                                                                                                                    |                     |                     |                     |                     |                 |
|                                  | Solvation shell ΔQ                              | 0.020 e / Å <sup>3</sup>                                                                                                                                                                                                                                                                                                                                                                                                               |                     |                     |                     |                     |                 |
|                                  | Ra                                              | 1.640 Å                                                                                                                                                                                                                                                                                                                                                                                                                                |                     |                     |                     |                     |                 |
|                                  | Volume                                          | 757369 Å <sup>3</sup>                                                                                                                                                                                                                                                                                                                                                                                                                  |                     |                     |                     |                     |                 |
|                                  | χ <sup>2</sup> value                            | 1.347                                                                                                                                                                                                                                                                                                                                                                                                                                  |                     |                     |                     |                     |                 |
|                                  | Method                                          | MEMPROT; CRY SOL 2.0 (command line mode)                                                                                                                                                                                                                                                                                                                                                                                               |                     |                     |                     |                     |                 |
|                                  | Any measures of model precision                 | Protein model (PDB ID: 6FKF) with pseudo-atomic detergent belt obtained using MEMPROT. Parameters: detergent belt: adaptive shape algorithm type 2 (MBJP), a = 32.4 Å, b = 7.0 Å, t = 6.5 Å, e = 1.0, #                                                                                                                                                                                                                                |                     |                     |                     |                     |                 |
|                                  | Solvation shell ΔQ                              | 0.075 e / Å <sup>3</sup>                                                                                                                                                                                                                                                                                                                                                                                                               |                     |                     |                     |                     |                 |
|                                  | Ra                                              | 1.400 Å                                                                                                                                                                                                                                                                                                                                                                                                                                |                     |                     |                     |                     |                 |
|                                  | Volume                                          | 980265 Å <sup>3</sup>                                                                                                                                                                                                                                                                                                                                                                                                                  |                     |                     |                     |                     |                 |
|                                  | χ <sup>2</sup> value                            | 1.149                                                                                                                                                                                                                                                                                                                                                                                                                                  |                     |                     |                     |                     |                 |
|                                  | Method                                          | OLIGOMER                                                                                                                                                                                                                                                                                                                                                                                                                               |                     |                     |                     |                     |                 |
|                                  | Any measures of model precision                 | Experimental data were fitted by a set of curves calculated using CRY SOL 2.0 (command line mode) and dimers of cFoF <sub>1</sub> . Calculations of a set of form-factors were performed for the models of monomeric cFoF <sub>1</sub> containing detergent belts obtained by MEMPROT using the optimal parameters of the obtained for the AEX-purified protein: Ra = 1.4 Å, ΔQ(shell) = 0.075 e / Å <sup>3</sup> , monomer volume = 9 |                     |                     |                     |                     |                 |
|                                  | Volume fraction of the cFoF <sub>1</sub> dimers |                                                                                                                                                                                                                                                                                                                                                                                                                                        | 0.733 ± 0.022       | 0.214 ± 0.022       | 0.431 ± 0.024       | 0.350 ± 0.020       |                 |
|                                  | χ <sup>2</sup> value                            |                                                                                                                                                                                                                                                                                                                                                                                                                                        | 1.29                | 1.11                | 1.25                | 1.00                |                 |
|                                  | (f) Data and model deposition IDs *             |                                                                                                                                                                                                                                                                                                                                                                                                                                        |                     |                     |                     |                     |                 |
|                                  |                                                 | ATPs AEX                                                                                                                                                                                                                                                                                                                                                                                                                               | ATPs<br>150 mM NaCl | ATPs<br>250 mM NaCl | ATPs<br>300 mM NaCl | ATPs<br>350 mM NaCl |                 |
|                                  |                                                 | SASDRR8                                                                                                                                                                                                                                                                                                                                                                                                                                | SASDRS8             | SASDRT8             | SASDRU8             | SASDRV8             |                 |



**Text document S1.** Estimation of the inter-monomer distance in ATP-synthase dimers.

For a mixture of various types of particles with different volumes ( $V_j$ ), scattering length densities ( $\Delta\bar{\rho}_j$ ) and gyration radii ( $Rg_j$ ) scattering intensity dependence on the scattering vector absolute value using Guinier approximation (at “small”  $q$ , when  $q \times Rg \ll 1$ ) is given by:

$$I(q) = \sum_j n_j V_j^2 \Delta\bar{\rho}_j^2 \left( 1 - \frac{Rg_j^2}{3} q^2 \right) \quad (S1)$$

where  $n_j$  is the concentration of the  $j^{\text{th}}$  type of particles respectively. In case when there are two types of particles: monomers ( $j = 1$ ) and dimers ( $j = 2$ ), the following relations take place:

$$\begin{cases} V_2 = 2V_1, \\ m_2 = 2m_1 \\ \Delta\bar{\rho}_1 = \Delta\bar{\rho}_2, \\ Rg_2^2 = Rg_1^2 + (D_{m-m}/2)^2, \\ n_1 = c(1 - \alpha)/m_1, \\ n_2 = c\alpha/m_2, \end{cases} \quad (S2)$$

where  $c$  is the total protein mass concentration,  $\alpha$  is the dimer volume fraction,  $m_j$  is the certain type particle mass,  $D_{m-m}$  is the inter-monomer distance between the mass centers within a dimer.

Using relations (2), equation (1) can be rearranged as:

$$I(q) = n_1 V_1^2 \Delta\bar{\rho}_1^2 (1 + \alpha) \left( 1 - \left( Rg_1^2 + \frac{2\alpha}{1 + \alpha} \left( \frac{D_{m-m}}{2} \right)^2 \right) \frac{q^2}{3} \right). \quad (S3)$$

On the other side, scattering intensity for a mixture at small  $q$  can be expressed by Guinier approximation in terms of apparent radius of gyration  $Rg_{mix}$ :

$$I(q) \equiv I(0) \left( 1 - \frac{Rg_{mix}^2}{3} q^2 \right). \quad (S4)$$

Thus, relation of gyration radius of the mixture, gyration radius of the monomer  $Rg_1 \equiv Rg_{mono}$  and the inter-monomer distance between the mass centers within a dimer can be expressed as:

$$Rg_{mix}^2 = Rg_{mono}^2 + \frac{2\alpha}{1 + \alpha} \left( \frac{D_{m-m}}{2} \right)^2. \quad (S5)$$

Hence, transforming the equation (6), one can get an expression for  $D_{m-m}$ :

$$D_{m-m} = 2 \sqrt{\frac{1 + \alpha}{2\alpha} (Rg_{mix}^2 - Rg_{mono}^2)}. \quad (S6)$$

The Porod volume  $V$  of the particle can be calculated using the Porod invariant  $Q$  (see ref. 15 in the main text):

$$V_P = \frac{2\pi^2 I(0)}{Q} = \frac{2\pi^2 I(0)}{\int_0^{+\infty} I(q) q^2 dq}. \quad (S7)$$

For a mixture of various types of particles, particularly, in the case of a mixture of monomers and dimers, apparent Porod volume is equal to:

$$V_{P,mix} = \sum_j \alpha_j V_j = (1 + \alpha) V_{P,mono}. \quad (S8)$$

Volume fraction of the dimers  $\alpha$  can be expressed from (8) as:

$$\alpha = V_{P,mix}/V_{P,mono} - 1. \quad (S9)$$

71

72
